# Supplementary material
Source: PubMed Central journal article supplement (PMC8547424)
Supplement: mcb.00122-21-s0001.pdf [file mcb.00122-21-s0001.pdf]

1 Supplemental legend:

2 Video S1: Maximized Z-stack images obtained at 10 min intervals over a 4h time period of the  
3 *hsp104* deletion strain constitutively expressing HttQ103 from the *GPD* promoter after induction  
4 of Hsp104 expression with galactose.

5 Video S2: Maximized Z-stack images obtained at 10 min intervals over a 7h time period of the  
6 *hsp104* deletion strain constitutively expressing HttQ103 from the *GPD* promoter after induction  
7 of Hsp104 expression with galactose.

8

9

10

11
